# Supplementary figures and images for: Comparison of Preference for Chemicals Associated with Fruit Fermentation between Drosophila melanogaster and Drosophila suzukii and between Virgin and Mated D. melanogaster
Source: MDPI journal article supplement (doi:10.3390/insects14040382), 2023-04-14

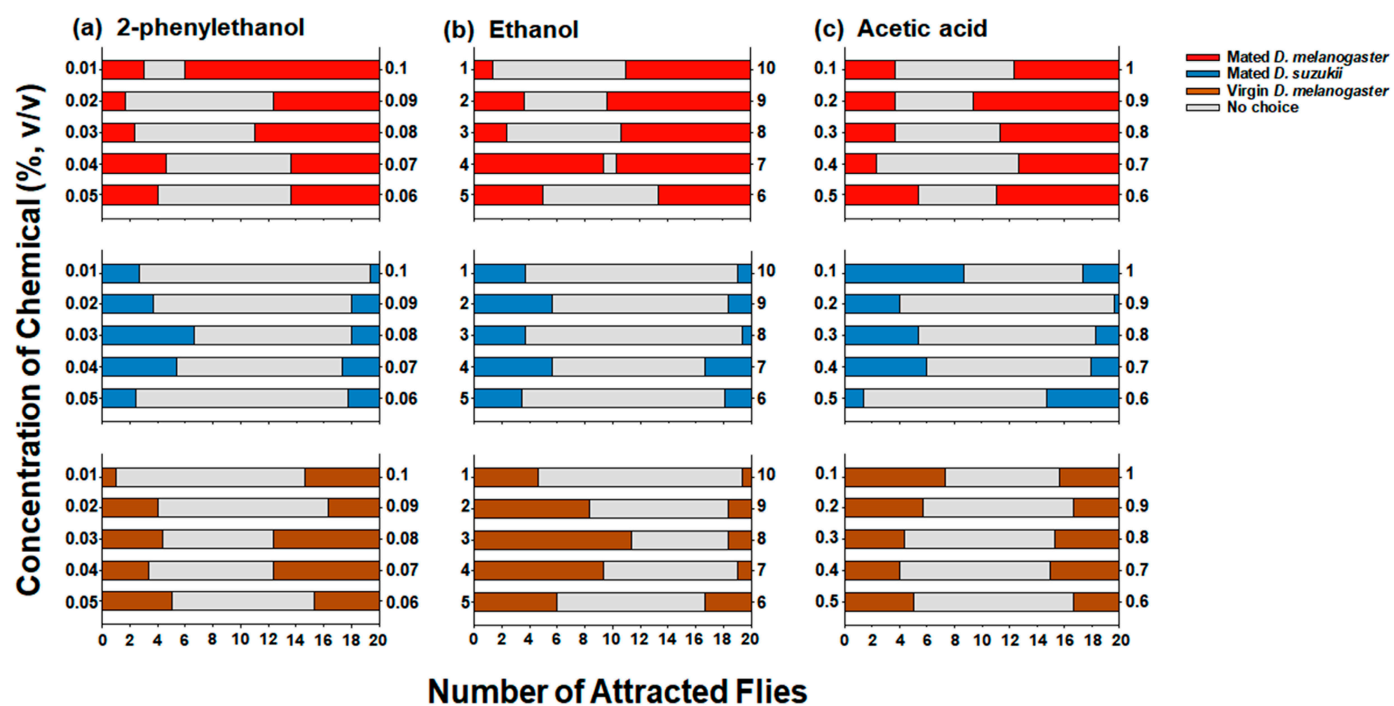

Figure S1. Number of Attracted Flies.

Supplement: s1 [file s1]
